# Supplementary material for: A Systematic Review and Meta-Analysis on the Impact of Statin Treatment in HIV Patients on Antiretroviral Therapy
Source: MDPI journal article supplement (doi:10.3390/ijerph20095668), 2023-04-27
Supplement: s1 [file s1]

# A systematic Review and Meta-Analysis on the Impact of Statin Treatment in HIV Patients on Antiretroviral Therapy

Kabelo Mokgalaboni <sup>1,\*</sup>, Wendy Nokhwezi Phoswa <sup>1</sup>, Samantha Yates <sup>1</sup>, Sogolo Lucky Lebelo <sup>1</sup>, Sphiwe Madiba <sup>2</sup> and Perpetua Modjadji <sup>3</sup>

<sup>1</sup> Department of Life and Consumer Sciences, College of Agriculture and Environmental Sciences, University of South Africa, Florida Campus, Johannesburg 1709, South Africa; phoswwn@unisa.ac.za (W.N.P.); blakes@unisa.ac.za (S.Y.); lebelol@unisa.ac.za (S.L.L.)

<sup>2</sup> Faculty of Health Sciences, University of Limpopo, Polokwane 0700, South Africa; sphiwe.madiba@ul.ac.za

<sup>3</sup> Non-Communicable Disease Research Unit, South African Medical Research Council, Cape Town 7505, South Africa; perpetua.modjadji@mrc.ac.za

\* Correspondence: mokgak@unisa.ac.za

## Search strategy

Table S1A: Search strategy adapted on PubMed on the 18<sup>th</sup> February, 2023

| MesH Terms                                                                                                                                                                                                                                   | Number of records |
|----------------------------------------------------------------------------------------------------------------------------------------------------------------------------------------------------------------------------------------------|-------------------|
| Statins                                                                                                                                                                                                                                      | 34117             |
| Atorvastatin                                                                                                                                                                                                                                 | 7321              |
| Rosuvastatin                                                                                                                                                                                                                                 | 2,884             |
| Pitavastatin                                                                                                                                                                                                                                 | 0                 |
| Lovastatin                                                                                                                                                                                                                                   | 11888             |
| HIV                                                                                                                                                                                                                                          | 106721            |
| <b>Final search with restrictions</b>                                                                                                                                                                                                        |                   |
| <b>Randomised controlled trials</b>                                                                                                                                                                                                          |                   |
| (((((Statins[MeSH Terms]) OR (Atorvastatin[MeSH Terms])) OR (Rosuvastatin[MeSH Terms])) OR (Pravastatin[MeSH Terms])) OR (Pitavastatin[MeSH Terms])) OR (Lovastatin[MeSH Terms])) AND (HIV[MeSH Terms]) Filters: Randomized Controlled Trial | 15                |

Table S1B: Search strategy adapted on Scopus

| Search terms and strategy                                         | Number of records |
|-------------------------------------------------------------------|-------------------|
| Statin OR hmg-coa AND reductase AND inhibitors OR atorvastatin OR | 710               |

|                                                                                                                                                                                                                                                               |  |
|---------------------------------------------------------------------------------------------------------------------------------------------------------------------------------------------------------------------------------------------------------------|--|
| fluvastatin OR simvastatin OR rosuvastatin OR lovastatin OR pitavastatin<br><br>AND hiv OR aids AND anti-retroviral<br>AND therapy OR art AND ( LIMIT-TO ( LANGUAGE , "English" ) )<br>AND ( LIMIT TO ( SRCTYPE , "j" ) ) AND ( LIMIT-TO ( DOCTYPE , "ar" ) ) |  |
|---------------------------------------------------------------------------------------------------------------------------------------------------------------------------------------------------------------------------------------------------------------|--|

**Table S1C: Search strategy adapted on Cochrane Library**

| Search terms and strategy                                                                        | Number of records |
|--------------------------------------------------------------------------------------------------|-------------------|
| <b>Statins in HIV patients on Antiretroviral therapy in Title Abstract</b><br><br><b>Keyword</b> | 70                |

**Table S2: Quality assessment according to a modified JADAD score guideline.**

| Study           | Was the study described as randomised? | Was double-blinded correct? | Losses and exclusions were described | The randomisation was adequate. | Total     | Judgement |
|-----------------|----------------------------------------|-----------------------------|--------------------------------------|---------------------------------|-----------|-----------|
| Bonnet[1]       | 1                                      | 1                           | 1                                    | 0                               | 3         | Good      |
| Hearps[2]       | 1                                      | 1                           | 0                                    | 0                               | 2         | Fair      |
| Hileman[3]      | 1                                      | 1                           | 1                                    | 1                               | 4         | Excellent |
| Hileman [4]     | 1                                      | 0                           | 1                                    | 1                               | 3         | Good      |
| Hu"rlimann[5]   | 1                                      | 1                           | 0                                    | 0                               | 2         | Fair      |
| Kamari[6]       | 1                                      | 1                           | 1                                    | 1                               | 4         | Excellent |
| Longenecker[7]  | 1                                      | 1                           | 1                                    | 1                               | 4         | Excellent |
| Mallon[8]       | 1                                      | 1                           | 0                                    | 1                               | 3         | Good      |
| Morrison[9]     | 1                                      | 1                           | 0                                    | 1                               | 3         | Good      |
| Nakanjako[10]   | 1                                      | 1                           | 1                                    | 1                               | 4         | Excellent |
| Nixon[11]       | 1                                      | 1                           | 1                                    | 0                               | 3         | Good      |
| Nou[12]         | 1                                      | 1                           | 1                                    | 1                               | 4         | Excellent |
| Stein[13]       | 1                                      | 1                           | 0                                    | 1                               | 3         | Good      |
| Trevillyan[14]  | 1                                      | 1                           | 1                                    | 1                               | 4         | Excellent |
| Wongprikorn[15] | 1                                      | 1                           | 0                                    | 1                               | 3         | Good      |
| Eckard[16]      | 1                                      | 1                           | 1                                    | 1                               | 4         | Excellent |
| Erlandson[17]   | 1                                      | 1                           | 1                                    | 0                               | 3         | Good      |
| Funderburg[18]  | 1                                      | 1                           | 1                                    | 1                               | 4         | Excellent |
| Do [19]         | 1                                      | 0                           | 1                                    | 1                               | 3         | Good      |
| defilippi[21]   | 1                                      | 1                           | 1                                    | 0                               | 3         | Good      |
| <b>total</b>    | <b>20</b>                              | <b>18</b>                   | <b>14</b>                            | <b>14</b>                       | <b>66</b> |           |

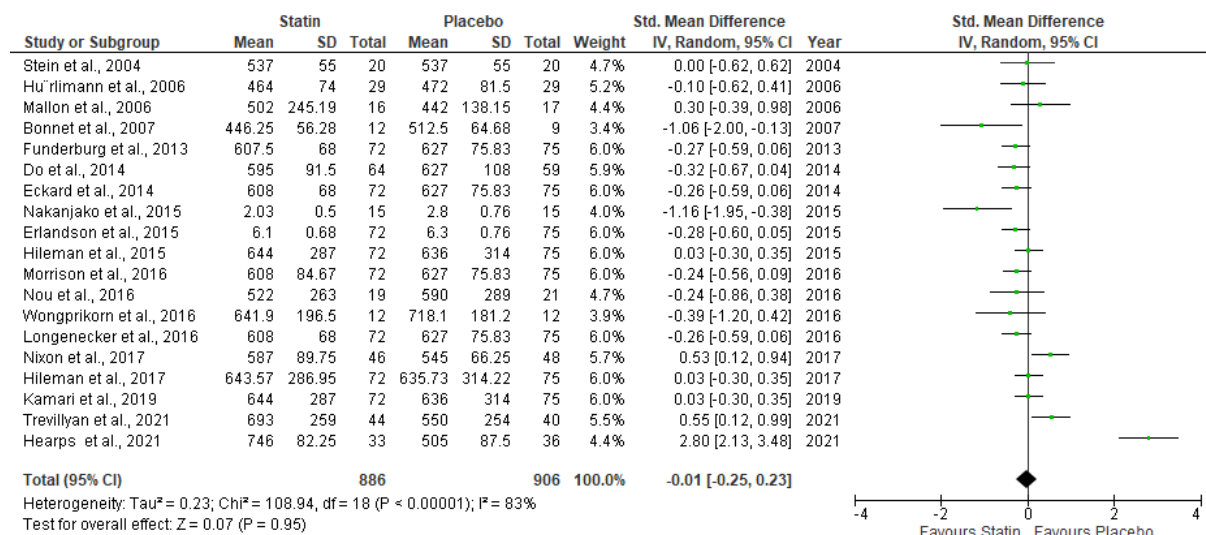

**Figure S1:** Effect of statin on baseline CD4 count in PLHIV on ART. I<sup>2</sup> statistic was used to assess statistical heterogeneity. The probability value of less than 0.05 was considered statistically significant.

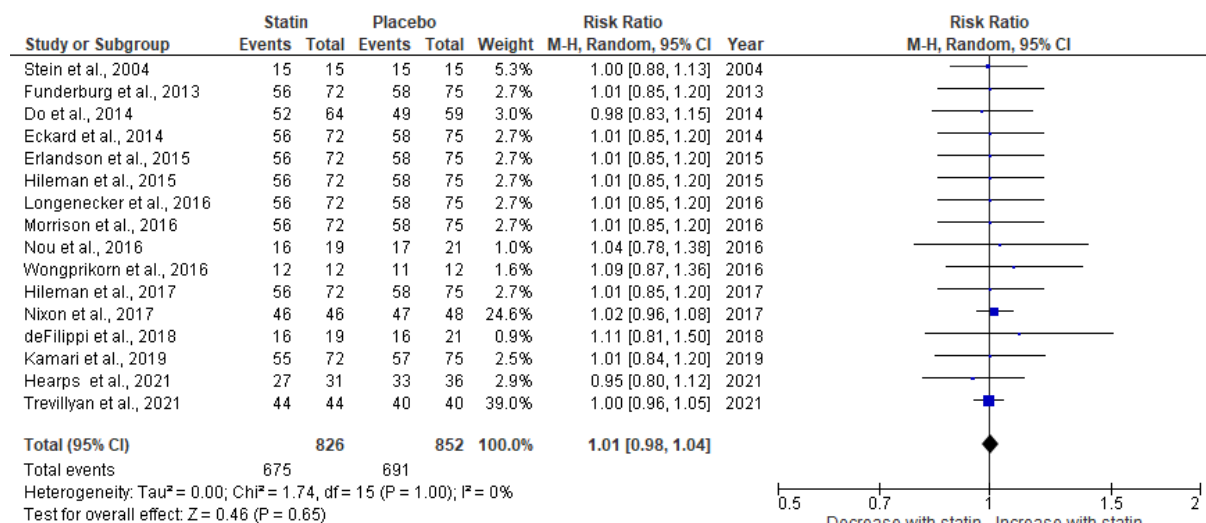

**Figure S2:** Effect of statin on undetectable viral load. I<sup>2</sup> statistic was used to assess statistical heterogeneity. The probability value of less than 0.05 was considered statistically significant.

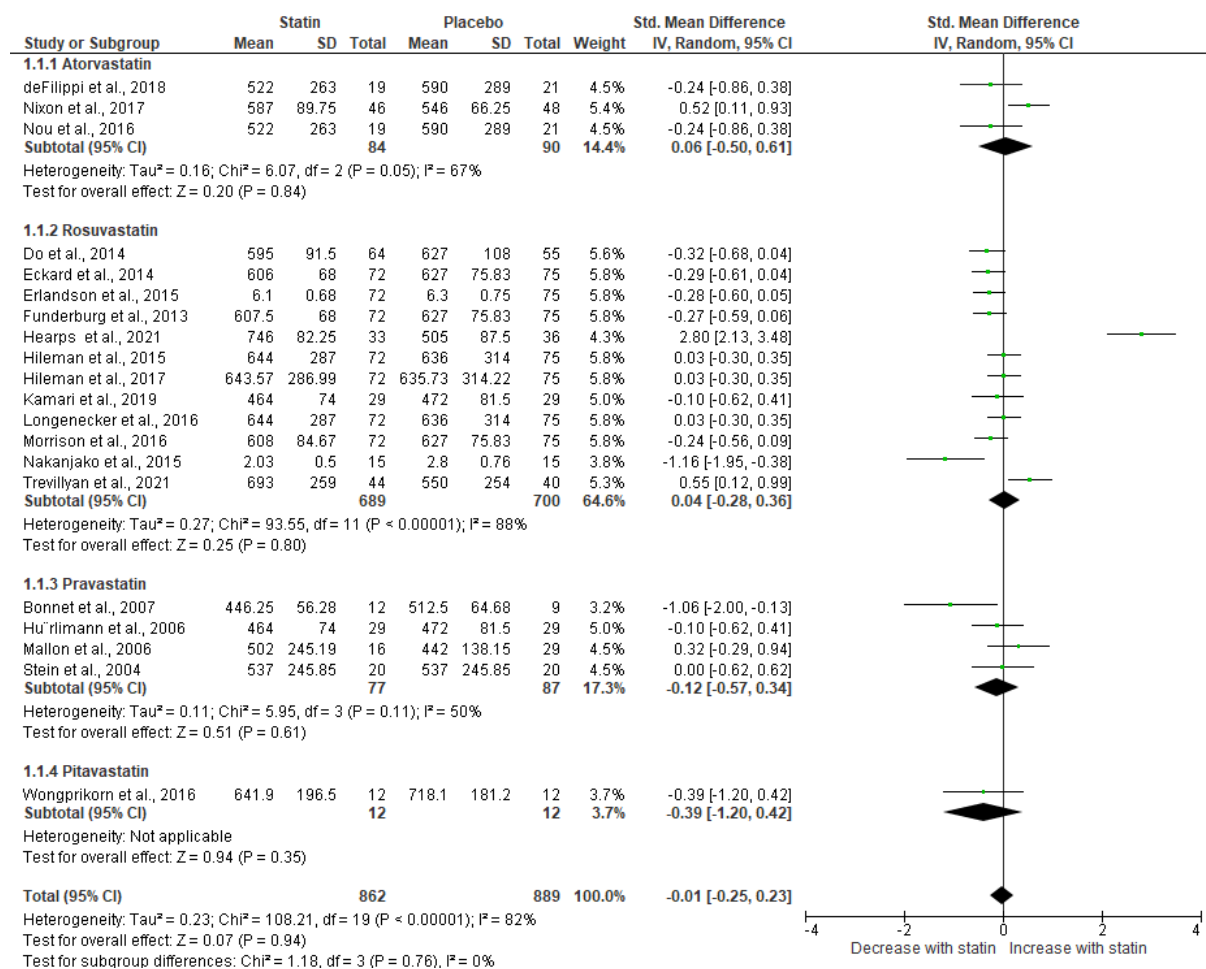

**Figure S3:** Subgroup analysis for CD4 count baseline according to statins.  $I^2$  statistic was used to assess statistical heterogeneity. The probability value of less than 0.05 was considered statistically significant.

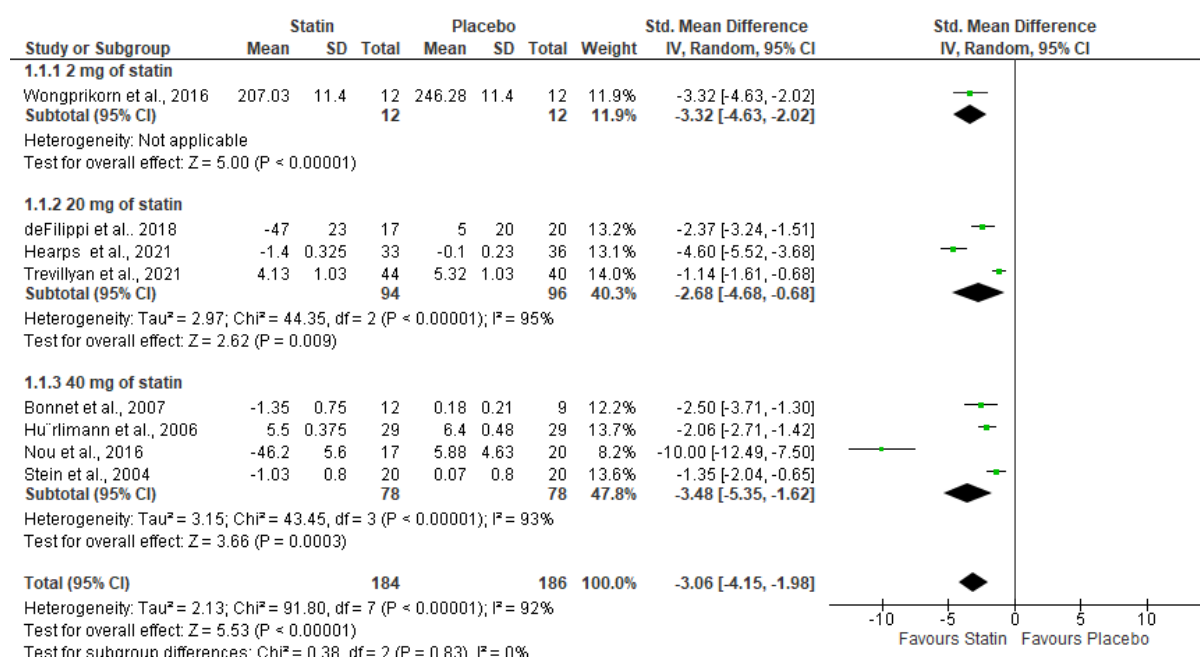

**Figure S4:** Subgroup total cholesterol according to doses of statin. I<sup>2</sup> statistic was used to assess statistical heterogeneity. The probability value of less than 0.05 was considered statistically significant.

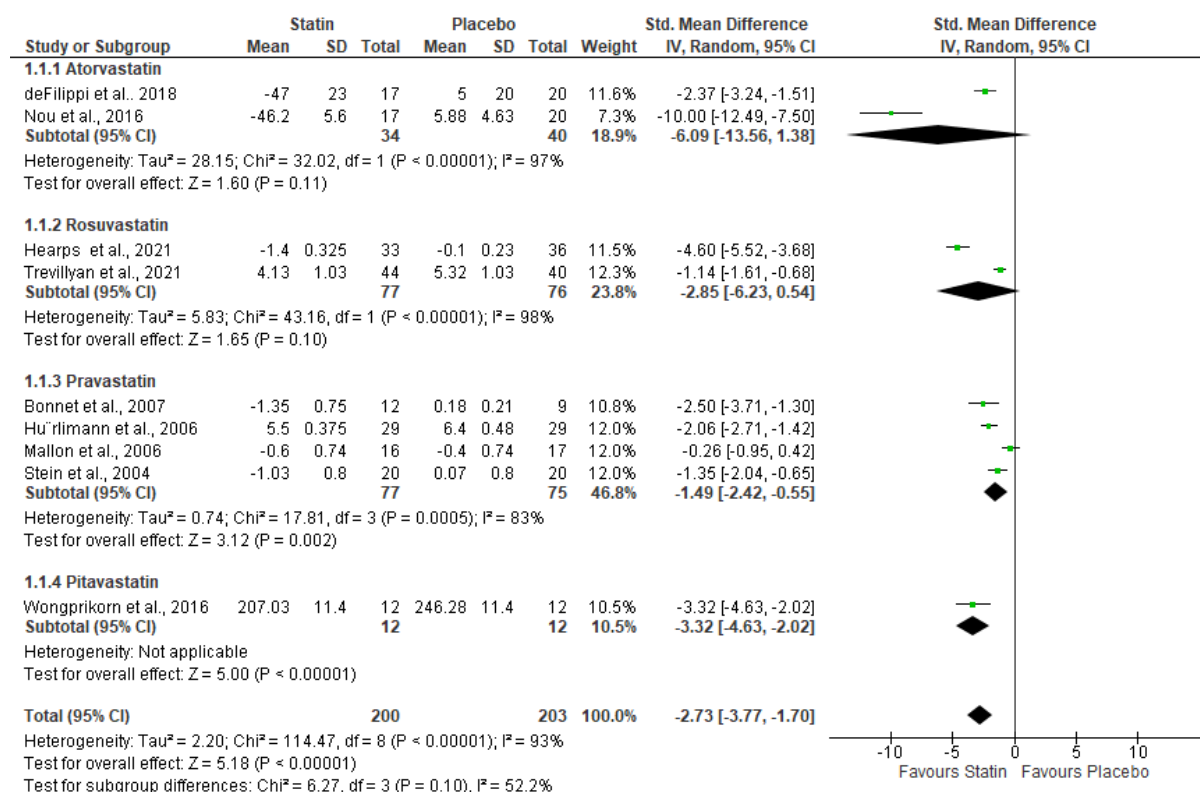

**Figure S5:** Subgroup total cholesterol according to the form of statin. I<sup>2</sup> statistic was used to assess statistical heterogeneity. The probability value of less than 0.05 was considered statistically significant.

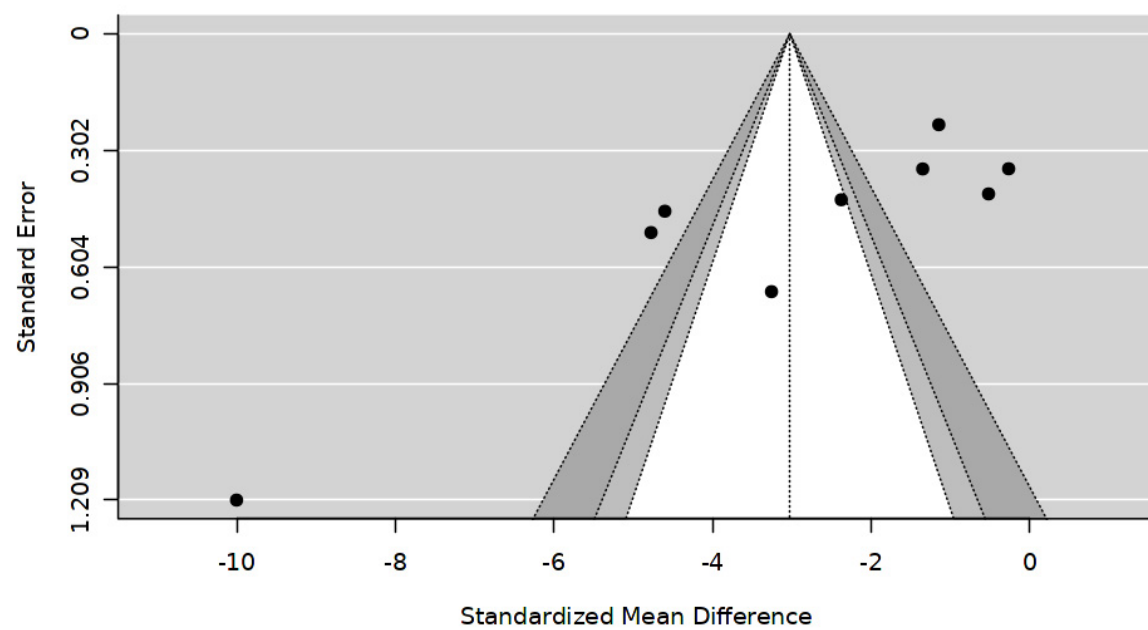

**Figure S6:** Publication bias for total cholesterol using a funnel plot.
